# Supplementary material for: Mosquito Infection Responses to Developing Filarial Worms
Source: PLoS Negl Trop Dis. 2009 Oct 13;3(10):e529. doi: 10.1371/journal.pntd.0000529 (PMC2752998; doi:10.1371/journal.pntd.0000529)
Supplement: Table S4 — Comparative analysis to filarial infection responses of a non-compatible mosquito (Armigeres subalbatus). (0.05 MB XLS) [file pntd.0000529.s004.xls]

## Sheet: log2_comparison
					Ae. aegypti Response*					Armigeres Response*
Orthologous	ARMI	AAEL	Gene Name	Functional Group (Nene et al. 2007)	GR1 (<=24hr)	GR2 (2-3d)	GR3 (5-6d)	GR4 (8-9d	GR5 (13-14d)	1hr	3hr	6hr	12hr	24hr	2 d	3 d
m	ARALL_v2_ACN-0181224	>AAEL002625-PA|AAEL002625-RA|conserved hypothetical protein	conserved hypothetical protein	CS	0.75	0.39			0.52
y	ARALL_v2_ACN-0182657	>AAEL007604-PA|AAEL007604-RA|odorant-binding protein 56a, putative	Odorant-binding protein 56a, putative	CSR		-0.25		0.28	0.92
m	ARALL_v2_ACN-0181261	>AAEL002533-PA|AAEL002533-RA|conserved hypothetical protein	conserved hypothetical protein	D		-0.17			0.8				-1.54	-0.41
m	ARALL_v2_ACN-0184757	>AAEL013327-PA|AAEL013327-RA|conserved hypothetical protein	conserved hypothetical protein	D			0.13		0.85
m	ARALL_v2_ACN-0185083	>AAEL009508-PA|AAEL009508-RA|zinc finger protein	zinc finger protein	D		0.36	0.8	0.3				1.88		0.48
m	ARALL_v2_ACN-0188015	>AAEL006353-PA|AAEL006353-RA|sulfotransferase (sult)	sulfotransferase (sult)	D			-0.36	-0.18	-0.75							1.94
y	ARALL_v2_ACN-0181518	>AAEL013349-PA|AAEL013349-RA|lethal(2)essential for life protein, l2efl	lethal(2)essential for life protein, l2efl	D			0.76	1.29					-1.46			-0.38
y	ARALL_v2_ACN-0182012	>AAEL005228-PA|AAEL005228-RA|conserved hypothetical protein	conserved hypothetical protein	D			0.38		0.86		1.96
y	ARALL_v2_ACN-0184038	>AAEL003289-PA|AAEL003289-RA|alkaline phosphatase	alkaline phosphatase	D					1			2.42		0.34
y	ARALL_v2_ACN-0187367	>AAEL013557-PA|AAEL013557-RA|conserved hypothetical protein	conserved hypothetical protein	D			-0.55	-0.4	-1	-1.51
y	ARALL_v2_ACN-0185865	>AAEL013707-PA|AAEL013707-RA|trypsin	trypsin	DIG	0.56			-0.26	0.82
y	ARALL_v2_ACN-0185880	>AAEL008781-PA|AAEL008781-RA|serine-type enodpeptidase,	serine-type enodpeptidase,	DIG	-0.78			0.23		-2.21						-0.67
m	ARALL_v2_ACN-0180859	>AAEL003294-PA|AAEL003294-RA|fibrinogen and fibronectin	FREP	I		0.01	0.37	0.4	0.78				1.1
m	ARALL_v2_ACN-0181027	>AAEL014349-PA|AAEL014349-RA|serine protease	CLIPSP	I	0.61	0.09	0.29	0.48	0.78			-2.15
m	ARALL_v2_ACN-0181325	>AAEL010267-PA|AAEL010267-RA|serine protease	serine protease	I				0.33	0.78	-1.4	-2.72	-2.85	-2.23
m	ARALL_v2_ACN-0181507	>AAEL005748-PA|AAEL005748-RA|elastase, putative	elastase, putative	I	0.76		0.32	0.56	0.43					0.56	1.81
m	ARALL_v2_ACN-0183253	>AAEL005060-PA|AAEL005060-RA|serine protease	CLIPSP	I				-0.16	1.16		-3.09	-4.16	-3.68
m	ARALL_v2_ACN-0184171	>AAEL010267-PA|AAEL010267-RA|serine protease	serine protease	I				0.33	0.78				-2.68
m	ARALL_v2_ACN-0184394	>AAEL014349-PA|AAEL014349-RA|serine protease	CLIPSP	I	0.61	0.09	0.29	0.48	0.78		-4.35					-0.94
m	ARALL_v2_ACN-0185551	>AAEL014349-PA|AAEL014349-RA|serine protease	CLIPSP	I	0.61	0.09	0.29	0.48	0.78		-1.32		-3.65
m	ARALL_v2_ACN-0185612	>AAEL014349-PA|AAEL014349-RA|serine protease	CLIPSP	I	0.61	0.09	0.29	0.48	0.78			-1.24	-2.32
m	ARALL_v2_ACN-0187830	>AAEL010267-PA|AAEL010267-RA|serine protease	serine protease	I				0.33	0.78		-3.82				-1.29
y	ARALL_v2_ACN-0180341	>AAEL000627-PA|AAEL000627-RA|antibacterial peptide, putative	CEC1D = CECA	I		-0.91	1.28		-0.15			1.77
y	ARALL_v2_ACN-0180530	>AAEL000627-PA|AAEL000627-RA|antibacterial peptide, putative	CEC1D = CECA	I		-0.91	1.28		-0.15			1.53				-0.98
y	ARALL_v2_ACN-0180850	>AAEL003857-PA|AAEL003857-RA|conserved hypothetical protein	DEF1B = DEFD	I	0.95		0.51	0.59	0.52				-1.44
y	ARALL_v2_ACN-0181829	>AAEL004863-PA|AAEL004863-RA|conserved hypothetical protein	conserved hypothetical protein	I	0.44		-0.04	0.19	0.77		-2.78
y	ARALL_v2_ACN-0185027	>AAEL003857-PA|AAEL003857-RA|conserved hypothetical protein	DEF1B = DEFD	I	0.95		0.51	0.59	0.52				-1.58
y	ARALL_v2_ACN-0186737	>AAEL013499-PA|AAEL013499-RA|prophenoloxidase	PPO2	I		0.02	0.18	0.1	0.8			1.85				0.88
y	ARALL_v2_ACN-0186825	>AAEL000627-PA|AAEL000627-RA|antibacterial peptide, putative	CEC1D = CECA	I		-0.91	1.28		-0.15		3.34
y	ARALL_v2_ACN-0187256	>AAEL007037-PA|AAEL007037-RA|peptidoglycan recognition protein sc2	PGRPS4	I		-0.09		0.27	0.89	1.97
y	ARALL_v2_ACN-0187598	>AAEL014349-PA|AAEL014349-RA|serine protease	CLIPSP	I	0.61	0.09	0.29	0.48	0.78						1.37
m	ARALL_v2_ACN-0181180	>AAEL008751-PA|AAEL008751-RA|glucosyl/glucuronosyl transferases	glucosyl/glucuronosyl transferases	M				0.32	0.78		-1.97
m	ARALL_v2_ACN-0181227	>AAEL002959-PA|AAEL002959-RA|brain chitinase and chia	brain chitinase and chia	M			0.25	0.28	0.86			1.02
y	ARALL_v2_ACN-0187302	>AAEL005645-PA|AAEL005645-RA|hypothetical protein	hypothetical protein	PROT					0.8					-1.27
m	ARALL_v2_ACN-0182226	>AAEL008757-PA|AAEL008757-RA|juvenile hormone esterase	juvenile hormone esterase	REDOX/STRESS/MIT	1.02			0.25		1.72					1.94
m	ARALL_v2_ACN-0182343	>AAEL011761-PA|AAEL011761-RA|cytochrome P450	cytochrome P450	REDOX/STRESS/MIT					0.91			-2.22		0.45
m	ARALL_v2_ACN-0182496	>AAEL002633-PA|AAEL002633-RA|cytochrome P450	cytochrome P450	REDOX/STRESS/MIT	-0.57	-0.28	-0.5		-0.82		-5.28
m	ARALL_v2_ACN-0187336	>AAEL003748-PA|AAEL003748-RA|cytochrome P450	cytochrome P450	REDOX/STRESS/MIT	-0.73	-0.21	-0.45	-0.42	-0.88	1.12
y	ARALL_v2_ACN-0183934	>AAEL011761-PA|AAEL011761-RA|cytochrome P450	cytochrome P450	REDOX/STRESS/MIT					0.91	1.97
y	ARALL_v2_ACN-0186363	>AAEL006793-PA|AAEL006793-RA|cytochrome P450	cytochrome P450	REDOX/STRESS/MIT	-0.75	-0.36	-0.3	-0.27				3.57
y	ARALL_v2_ACN-0187803	>AAEL011761-PA|AAEL011761-RA|cytochrome P450	cytochrome P450	REDOX/STRESS/MIT					0.91			-1.22		0.28
y	ARALL_v2_ACN-0181082	>AAEL008936-PA|AAEL008936-RA|hypothetical protein	hypothetical protein	U	0.78			0.35			-4.29	-3.93	-4.1
y	ARALL_v2_ACN-0184874	>AAEL013728-PA|AAEL013728-RA|conserved hypothetical protein	conserved hypothetical protein	U	-0.77	-0.34					-1.49
y	ARALL_v2_ACN-0186845	>AAEL008106-PA|AAEL008106-RA|hypothetical protein	hypothetical protein	U	0.94			0.28		0.51			-3.98
y	ARALL_v2_ACN-0187011	>AAEL008106-PA|AAEL008106-RA|hypothetical protein	hypothetical protein	U	0.94			0.28			-3.05	-4.38	-4.05
y	ARALL_v2_ACN-0187879	>AAEL001573-PA|AAEL001573-RA|conserved hypothetical protein	conserved hypothetical protein	U		-0.32			-0.75		1.49

## Sheet: ratio_comparison
					Ae. aegypti Response*					Armigeres Response*
Orthologous	ARMI	AAEL	Gene Name	Functional Group (Nene et al. 2007)	GR1 (<=24hr)	GR2 (2-3d)	GR3 (5-6d)	GR4 (8-9d	GR5 (13-14d)	1hr	3hr	6hr	12hr	24hr	2 d	3 d
m	ARALL_v2_ACN-0181224	>AAEL002625-PA|AAEL002625-RA|conserved hypothetical protein	conserved hypothetical protein	CS	1.68179	1.31039			0.52
y	ARALL_v2_ACN-0182657	>AAEL007604-PA|AAEL007604-RA|odorant-binding protein 56a, putative	Odorant-binding protein 56a, putative	CSR		0.840896		0.28	0.92
y	ARALL_v2_ACN-0181518	>AAEL013349-PA|AAEL013349-RA|lethal(2)essential for life protein, l2efl	lethal(2)essential for life protein, l2efl	D			0.76	1.29					0.363493			0.768438
m	ARALL_v2_ACN-0188015	>AAEL006353-PA|AAEL006353-RA|sulfotransferase (sult)	sulfotransferase (sult)	D			-0.36	-0.18	-0.75							3.83706
m	ARALL_v2_ACN-0181261	>AAEL002533-PA|AAEL002533-RA|conserved hypothetical protein	conserved hypothetical protein	D		0.888843			0.8				0.343885	0.752623
y	ARALL_v2_ACN-0184038	>AAEL003289-PA|AAEL003289-RA|alkaline phosphatase	alkaline phosphatase	D					1			5.35171		1.26576
m	ARALL_v2_ACN-0185083	>AAEL009508-PA|AAEL009508-RA|zinc finger protein	zinc finger protein	D		1.28343	0.8	0.3				3.68075		1.39474
y	ARALL_v2_ACN-0182012	>AAEL005228-PA|AAEL005228-RA|conserved hypothetical protein	conserved hypothetical protein	D			0.38		0.86		3.89062
y	ARALL_v2_ACN-0187367	>AAEL013557-PA|AAEL013557-RA|conserved hypothetical protein	conserved hypothetical protein	D			-0.55	-0.4	-1	0.351111
m	ARALL_v2_ACN-0184757	>AAEL013327-PA|AAEL013327-RA|conserved hypothetical protein	conserved hypothetical protein	D			0.13		0.85
y	ARALL_v2_ACN-0185880	>AAEL008781-PA|AAEL008781-RA|serine-type enodpeptidase,	serine-type enodpeptidase,	DIG	0.582367			0.23		0.216134						0.628507
y	ARALL_v2_ACN-0185865	>AAEL013707-PA|AAEL013707-RA|trypsin	trypsin	DIG	1.47427			-0.26	0.82
y	ARALL_v2_ACN-0180530	>AAEL000627-PA|AAEL000627-RA|antibacterial peptide, putative	CEC1D = CECA	I		0.532185	1.28		-0.15			2.88786				0.50698
m	ARALL_v2_ACN-0184394	>AAEL014349-PA|AAEL014349-RA|serine protease	CLIPSP	I	1.52626	1.06437	0.29	0.48	0.78		0.0490365					0.521233
y	ARALL_v2_ACN-0186737	>AAEL013499-PA|AAEL013499-RA|prophenoloxidase	PPO2	I		1.01396	0.18	0.1	0.8			3.605				1.84038
m	ARALL_v2_ACN-0187830	>AAEL010267-PA|AAEL010267-RA|serine protease	serine protease	I				0.33	0.78		0.0708052				0.408951
y	ARALL_v2_ACN-0187598	>AAEL014349-PA|AAEL014349-RA|serine protease	CLIPSP	I	1.52626	1.06437	0.29	0.48	0.78						2.58471
m	ARALL_v2_ACN-0181507	>AAEL005748-PA|AAEL005748-RA|elastase, putative	elastase, putative	I	1.69349		0.32	0.56	0.43					1.47427	3.50642
m	ARALL_v2_ACN-0183253	>AAEL005060-PA|AAEL005060-RA|serine protease	CLIPSP	I				-0.16	1.16		0.11744	0.0559391	0.0780207
m	ARALL_v2_ACN-0185551	>AAEL014349-PA|AAEL014349-RA|serine protease	CLIPSP	I	1.52626	1.06437	0.29	0.48	0.78		0.400535		0.07966
m	ARALL_v2_ACN-0184171	>AAEL010267-PA|AAEL010267-RA|serine protease	serine protease	I				0.33	0.78				0.156041
m	ARALL_v2_ACN-0185612	>AAEL014349-PA|AAEL014349-RA|serine protease	CLIPSP	I	1.52626	1.06437	0.29	0.48	0.78			0.423373	0.200267
m	ARALL_v2_ACN-0181325	>AAEL010267-PA|AAEL010267-RA|serine protease	serine protease	I				0.33	0.78	0.378929	0.151774	0.138696	0.213159
y	ARALL_v2_ACN-0185027	>AAEL003857-PA|AAEL003857-RA|conserved hypothetical protein	DEF1B = DEFD	I	1.93187		0.51	0.59	0.52				0.334482
y	ARALL_v2_ACN-0180850	>AAEL003857-PA|AAEL003857-RA|conserved hypothetical protein	DEF1B = DEFD	I	1.93187		0.51	0.59	0.52				0.368567
m	ARALL_v2_ACN-0180859	>AAEL003294-PA|AAEL003294-RA|fibrinogen and fibronectin	FREP	I		1.00696	0.37	0.4	0.78				2.14355
m	ARALL_v2_ACN-0181027	>AAEL014349-PA|AAEL014349-RA|serine protease	CLIPSP	I	1.52626	1.06437	0.29	0.48	0.78			0.225313
y	ARALL_v2_ACN-0180341	>AAEL000627-PA|AAEL000627-RA|antibacterial peptide, putative	CEC1D = CECA	I		0.532185	1.28		-0.15			3.41054
y	ARALL_v2_ACN-0181829	>AAEL004863-PA|AAEL004863-RA|conserved hypothetical protein	conserved hypothetical protein	I	1.3566		-0.04	0.19	0.77		0.145592
y	ARALL_v2_ACN-0186825	>AAEL000627-PA|AAEL000627-RA|antibacterial peptide, putative	CEC1D = CECA	I		0.532185	1.28		-0.15		10.1261
y	ARALL_v2_ACN-0187256	>AAEL007037-PA|AAEL007037-RA|peptidoglycan recognition protein sc2	PGRPS4	I		0.939523		0.27	0.89	3.91768
m	ARALL_v2_ACN-0181227	>AAEL002959-PA|AAEL002959-RA|brain chitinase and chia	brain chitinase and chia	M			0.25	0.28	0.86			2.02792
m	ARALL_v2_ACN-0181180	>AAEL008751-PA|AAEL008751-RA|glucosyl/glucuronosyl transferases	glucosyl/glucuronosyl transferases	M				0.32	0.78		0.255253
y	ARALL_v2_ACN-0187302	>AAEL005645-PA|AAEL005645-RA|hypothetical protein	hypothetical protein	PROT					0.8					0.41466
m	ARALL_v2_ACN-0182226	>AAEL008757-PA|AAEL008757-RA|juvenile hormone esterase	juvenile hormone esterase	REDOX/STRESS/MIT	2.02792			0.25		3.29436					3.83706
y	ARALL_v2_ACN-0187803	>AAEL011761-PA|AAEL011761-RA|cytochrome P450	cytochrome P450	REDOX/STRESS/MIT					0.91			0.429283		1.21419
m	ARALL_v2_ACN-0182343	>AAEL011761-PA|AAEL011761-RA|cytochrome P450	cytochrome P450	REDOX/STRESS/MIT					0.91			0.214641		1.36604
y	ARALL_v2_ACN-0186363	>AAEL006793-PA|AAEL006793-RA|cytochrome P450	cytochrome P450	REDOX/STRESS/MIT	0.594604	0.779165	-0.3	-0.27				11.8762
m	ARALL_v2_ACN-0182496	>AAEL002633-PA|AAEL002633-RA|cytochrome P450	cytochrome P450	REDOX/STRESS/MIT	0.673617	0.823591	-0.5		-0.82		0.0257372
m	ARALL_v2_ACN-0187336	>AAEL003748-PA|AAEL003748-RA|cytochrome P450	cytochrome P450	REDOX/STRESS/MIT	0.602904	0.864537	-0.45	-0.42	-0.88	2.17347
y	ARALL_v2_ACN-0183934	>AAEL011761-PA|AAEL011761-RA|cytochrome P450	cytochrome P450	REDOX/STRESS/MIT					0.91	3.91768
y	ARALL_v2_ACN-0181082	>AAEL008936-PA|AAEL008936-RA|hypothetical protein	hypothetical protein	U	1.71713			0.35			0.0511189	0.0656073	0.0583146
y	ARALL_v2_ACN-0187011	>AAEL008106-PA|AAEL008106-RA|hypothetical protein	hypothetical protein	U	1.91853			0.28			0.120742	0.0480273	0.060371
y	ARALL_v2_ACN-0186845	>AAEL008106-PA|AAEL008106-RA|hypothetical protein	hypothetical protein	U	1.91853			0.28		1.42405			0.0633725
y	ARALL_v2_ACN-0184874	>AAEL013728-PA|AAEL013728-RA|conserved hypothetical protein	conserved hypothetical protein	U	0.586417	0.790041					0.356013
y	ARALL_v2_ACN-0187879	>AAEL001573-PA|AAEL001573-RA|conserved hypothetical protein	conserved hypothetical protein	U		0.80107			-0.75		2.80889
